# Supplementary material
Source: publisher figshare collection journal article supplement (https://karger.figshare.com/ndownloader/files/24043307)
Supplement: Supplementary file 1 [file 24043307]

**Supplemental Table 2. Primer sequences used in construction of Reporter Gene Plasmids.**

| Fragment of APC promoter 1B F | 5’- aaaggtaccGGGGCTGGGACAGAATTTTA-3’ |
| --- | --- |
| Fragment of APC promoter 1B R | 5’- cgatgaagcTTCACCTTCCTCACCAACAG-3’ |
| APC promoter 1B WT F | 5’-CtcttacgcgtgctagcccgggctcgagatctGGGCTGGGACAGAATTTTATTCATCTTTC |
| APC promoter 1B WT R | 5’-GTGGCTTTACCAACAGTACCGGAATGCCAAGCTTTCACCTTCCTCACCAACAGCCAACAAC |
| APC promoter 1B MUT F | 5’-CACCTCCCACAAGATAGCGGAGGGCAAGTAGCAAGGG |
| APC promoter 1B MUT R | 5’- GCTACTTGCCCTCCGCTATCTTGTGGGAGGTGGGAAG |
